# Supplementary material for: The Diversity, Resistance Profiles and Plasmid Content of Klebsiella spp. Recovered from Dairy Farms Located around Three Cities in Pakistan
Source: MDPI journal article supplement (doi:10.3390/antibiotics12030539), 2023-03-08

**Supplementary Table S1.** Serotypes and sequence types of sequenced *Klebsiella* spp. isolates.

| Strain | City       | Farm | ST         | Wzi    | K_locus | O_locus |
|--------|------------|------|------------|--------|---------|---------|
| P500   | Quetta     | B    | ST11       | wzi150 | unknown | OL101   |
| P501   | Quetta     | A    | ST985      | wzi39  | KL39    | O1v2    |
| P502   | Quetta     | T    | ST1446     | wzi39  | KL39    | O3b     |
| P503   | Quetta     | T    | ST37-1LV   | wzi14  | KL14    | O3b     |
| P505   | Quetta     | T    | ST3449     | wzi507 | KL14    | O5      |
| P506   | Quetta     | T    | ST687-1LV  | wzi39  | KL39    | O3/O3a  |
| P507   | Quetta     | T    | ST105-1LV  | wzi459 | KL20    | O3b     |
| P508   | Quetta     | T    | ST63-2LV   | wzi23  | KL14    | O3/O3a  |
| P509   | Quetta     | Al-K | ST4075     | wzi150 | unknown | OL101   |
| P510   | Quetta     | Al-K | ST1109     | wzi115 | KL54    | O1v2    |
| P511   | Quetta     | Al-K | ST736      | wzi171 | KL53    | O3/O3a  |
| P512   | Quetta     | Al-K | ST4461-1LV | wzi86  | KL125   | O5      |
| P513   | Quetta     | Ak   | ST2390     | wzi105 | KL103   | O1v1    |
| P514   | Quetta     | Ak   | ST218-1LV  | wzi77  | KL57    | O2v2    |
| P515   | Quetta     | Ak   | ST1037     | -      | KL27    | O2v2    |
| P516   | Quetta     | Ak   | ST37       | wzi14  | KL14    | O3b     |
| P517   | Quetta     | Bi   | ST2055     | wzi386 | unknown | OL104   |
| P518   | Quetta     | Bi   | ST104      | wzi102 | KL31    | O2v2    |
| P519   | Quetta     | Bi   | ST2320-2LV | wzi504 | KL1     | O3/O3a  |
| P520   | Quetta     | Bi   | ST3067     | wzi324 | KL63    | O3b     |
| P521   | Quetta     | Bi   | ST2118     | wzi417 | KL46    | O3b     |
| P522   | Quetta     | Bi   | ST1731     | wzi162 | KL122   | O1v2    |
| P523   | Quetta     | Bi   | ST37       | wzi14  | KL14    | O3b     |
| P524   | Quetta     | Sa   | ST1833-1LV | wzi64  | KL64    | O2v1    |
| P525   | Quetta     | Sa   | NA         | -      | unknown | unknown |
| P526   | Quetta     | Sa   | ST3186     | wzi19  | KL19    | O2v2    |
| P527   | Quetta     | Sa   | ST37       | wzi14  | KL14    | O3b     |
| P529   | Quetta     | Sa   | NA         | -      | unknown | unknown |
| P530   | Quetta     | Sa   | ST46       | wzi64  | KL64    | O2v1    |
| P537   | Sargodha   | U    | ST995      | wzi29  | KL106   | O1v2    |
| P538   | Sargodha   | U    | ST11       | wzi150 | unknown | OL101   |
| P540   | Sargodha   | U    | ST1391-1LV | wzi151 | KL48    | O1v1    |
| P541   | Faisalabad | SH   | ST1315     | wzi432 | KL64    | O2v2    |
| P542   | Faisalabad | SH   | ST605      | wzi42  | KL42    | O4      |
| P543   | Faisalabad | SH   | ST2219-1LV | wzi447 | unknown | OL101   |
| P544   | Faisalabad | SH   | ST2187     | -      | unknown | O4      |
| P545   | Faisalabad | SH   | ST1377-3LV | -      | KL144   | O4      |
| P547   | Faisalabad | SH   | ST190-2LV  | wzi50  | KL17    | O4      |
| P548   | Faisalabad | SH   | ST355      | wzi81  | KL131   | O5      |
| P549   | Faisalabad | SH   | ST37-2LV   | -      | unknown | unknown |
| P550   | Faisalabad | SH   | ST1315     | wzi432 | KL64    | O2v2    |
| P551   | Faisalabad | SH   | ST1835     | -      | unknown | O3b     |
| P552   | Faisalabad | SH   | ST45       | -      | KL153   | O2v1    |
| P553   | Faisalabad | SH   | ST17-1LV   | wzi82  | KL23    | O2v2    |
| P554   | Faisalabad | SH   | ST705-3LV  | -      | KL30    | O12     |
| P555   | Faisalabad | SH   | ST2876-1LV | wzi197 | KL141   | O4      |
| P557   | Faisalabad | SH   | ST1708-1LV | -      | unknown | OL103   |
| P558   | Faisalabad | SH   | ST34-2LV   | wzi81  | KL120   | O1v2    |
| P559   | Faisalabad | L    | ST191      | wzi42  | KL42    | O4      |

|      |            |   |            |        |       |      |
|------|------------|---|------------|--------|-------|------|
| P565 | Faisalabad | L | ST1412-1LV | wzi173 | KL102 | O2v2 |
| P568 | Faisalabad | L | ST37       | wzi14  | KL14  | O3b  |

**Supplementary Table S2.** Kleborate mean resistance and virulence scores of Kp isolates from the current study compared to a global dataset.

|                      | Pak-animal |          |          | Kleborate global dataset |             |             |
|----------------------|------------|----------|----------|--------------------------|-------------|-------------|
| <i>K. pneumoniae</i> | Total      | mean_vir | mean_res | total                    | mean_vir    | mean_res    |
| ST1037               | 1          | 0        | 0        | 6                        | 0.166666667 | 0.166666667 |
| ST104                | 1          | 0        | 0        | 9                        | 1           | 1.222222222 |
| ST105-1LV            | 1          | 0        | 0        | 1                        | 1           | 0           |
| ST11                 | 2          | 1        | 1        | 1169                     | 1.485885372 | 1.843455945 |
| ST1109               | 1          | 0        | 0        | 6                        | 0           | 0.5         |
| ST1315               | 2          | 0        | 0        | 2                        | 0           | 0           |
| ST1377-3LV           | 1          | 0        | 0        | N/A                      | N/A         | N/A         |
| ST1391-1LV           | 1          | 0        | 1        | N/A                      | N/A         | N/A         |
| ST1412-1LV           | 1          | 0        | 0        | N/A                      | N/A         | N/A         |
| ST1446               | 1          | 0        | 0        | 1                        | 0           | 0           |
| ST17-1LV             | 1          | 0        | 0        | 6                        | 0           | 0.5         |
| ST1731               | 1          | 0        | 0        | 3                        | 0           | 0.666666667 |
| ST1833-1LV           | 1          | 0        | 0        | 1                        | 0           | 2           |
| ST1835               | 1          | 0        | 0        | N/A                      | N/A         | N/A         |
| ST190-2LV            | 1          | 0        | 0        | N/A                      | N/A         | N/A         |
| ST191                | 1          | 0        | 0        | 1                        | 0           | 0           |
| ST2055               | 1          | 0        | 0        | 1                        | 0           | 0           |
| ST2118               | 1          | 0        | 0        | 2                        | 0           | 1           |
| ST218-1LV            | 1          | 0        | 0        | N/A                      | N/A         | N/A         |
| ST2187               | 1          | 0        | 0        | N/A                      | N/A         | N/A         |
| ST2219-1LV           | 1          | 0        | 0        | N/A                      | N/A         | N/A         |
| ST2390               | 1          | 0        | 0        | 2                        | 0           | 0.5         |
| ST2876-1LV           | 1          | 1        | 0        | N/A                      | N/A         | N/A         |
| ST3067               | 1          | 0        | 0        | 1                        | 1           | 0           |
| ST3186               | 1          | 0        | 0        | 1                        | 0           | 0           |
| ST34-2LV             | 1          | 0        | 0        | 2                        | 2           | 0           |
| ST37                 | 4          | 0        | 0        | 200                      | 0.325       | 0.73        |
| ST37-1LV             | 1          | 0        | 0        | 9                        | 0.333333333 | 1.333333333 |
| ST37-2LV             | 1          | 0        | 0        | 1                        | 0           | 3           |
| ST4075               | 1          | 0        | 0        | N/A                      | N/A         | N/A         |
| ST4461-1LV           | 1          | 0        | 0        | N/A                      | N/A         | N/A         |
| ST45                 | 1          | 1        | 0        | 190                      | 1.021052632 | 0.915789474 |
| ST46                 | 1          | 0        | 0        | 1                        | 0           | 1           |
| ST605                | 1          | 0        | 0        | 3                        | 0           | 0           |
| ST63-2LV             | 1          | 0        | 0        | N/A                      | N/A         | N/A         |
| ST687-1LV            | 1          | 0        | 0        | N/A                      | N/A         | N/A         |
| ST985                | 1          | 1        | 1        | 17                       | 0.705882353 | 0.882352941 |
| ST995                | 1          | 0        | 1        | 3                        | 0           | 1           |

**Supplementary Figure S1.** Species diversity and distribution in cattle from 10 different dairy farms in the cities of Quetta, Faisalabad and Sargodha in Pakistan.

For the format used in this figure: <https://microreact.org/project/gYYDfWDgs2eB7KAA7URKwW-species-distribution>

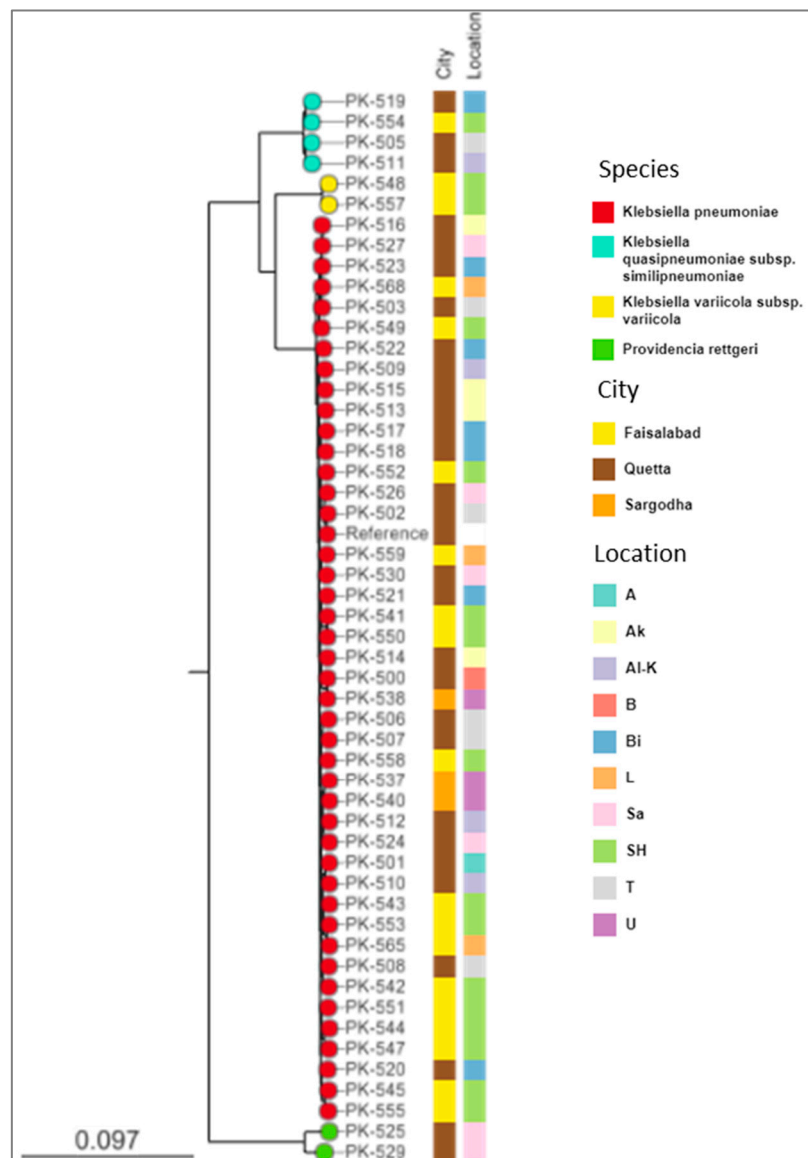

Supplementary Figure S2. AMR distribution among species.

<https://microreact.org/project/c7qYSGsQg5dxgDjYXfPitN-amr-genes>

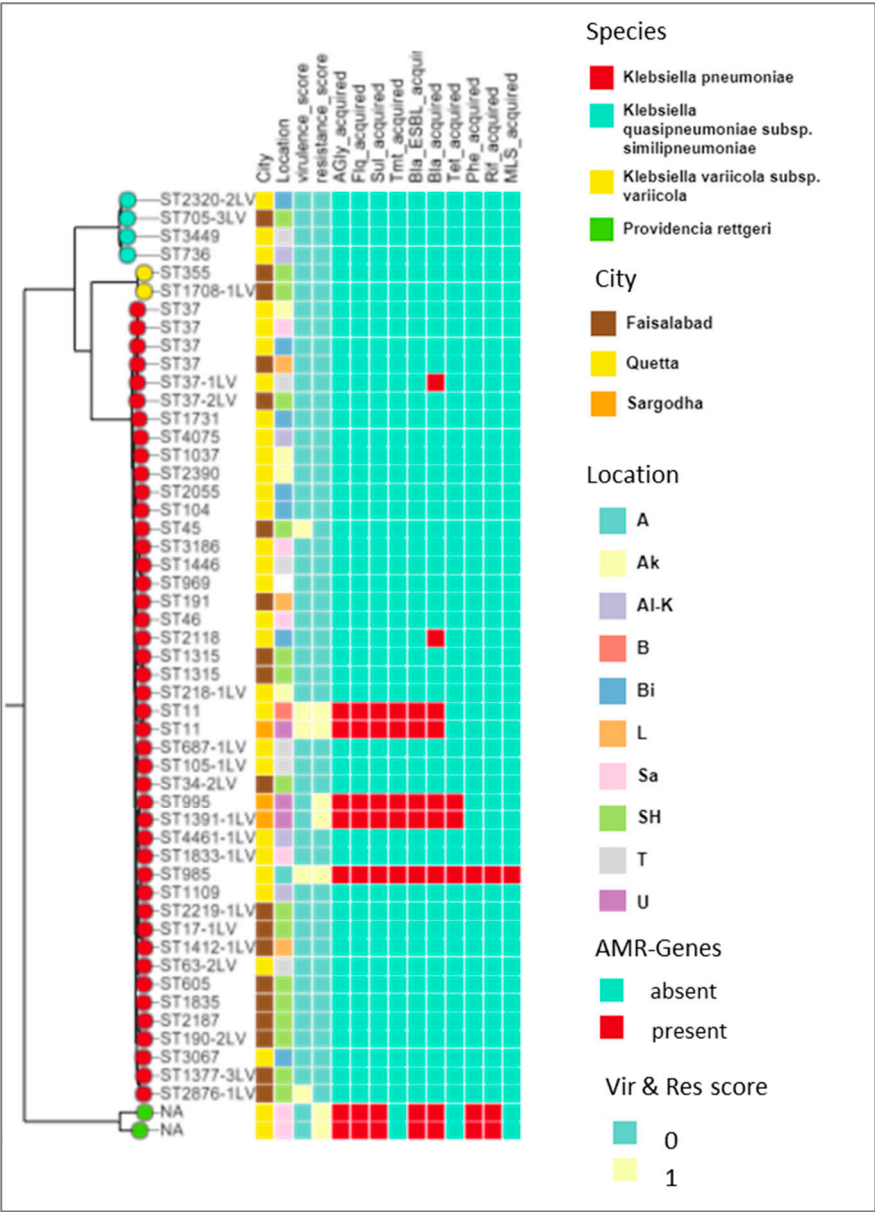

**Supplementary Figure S3.** Approximate maximum likelihood phylogenetic tree (midpoint rooted) of the 51 isolates analysed. Species and location of each isolate and presence of plasmids identified using MOB-suite are indicated. A red asterisk indicates plasmids associated with resistance genes.

[https://microreact.org/project/eJfKQuN5YKyTagqK8FG44P-plasmid\\_](https://microreact.org/project/eJfKQuN5YKyTagqK8FG44P-plasmid_)

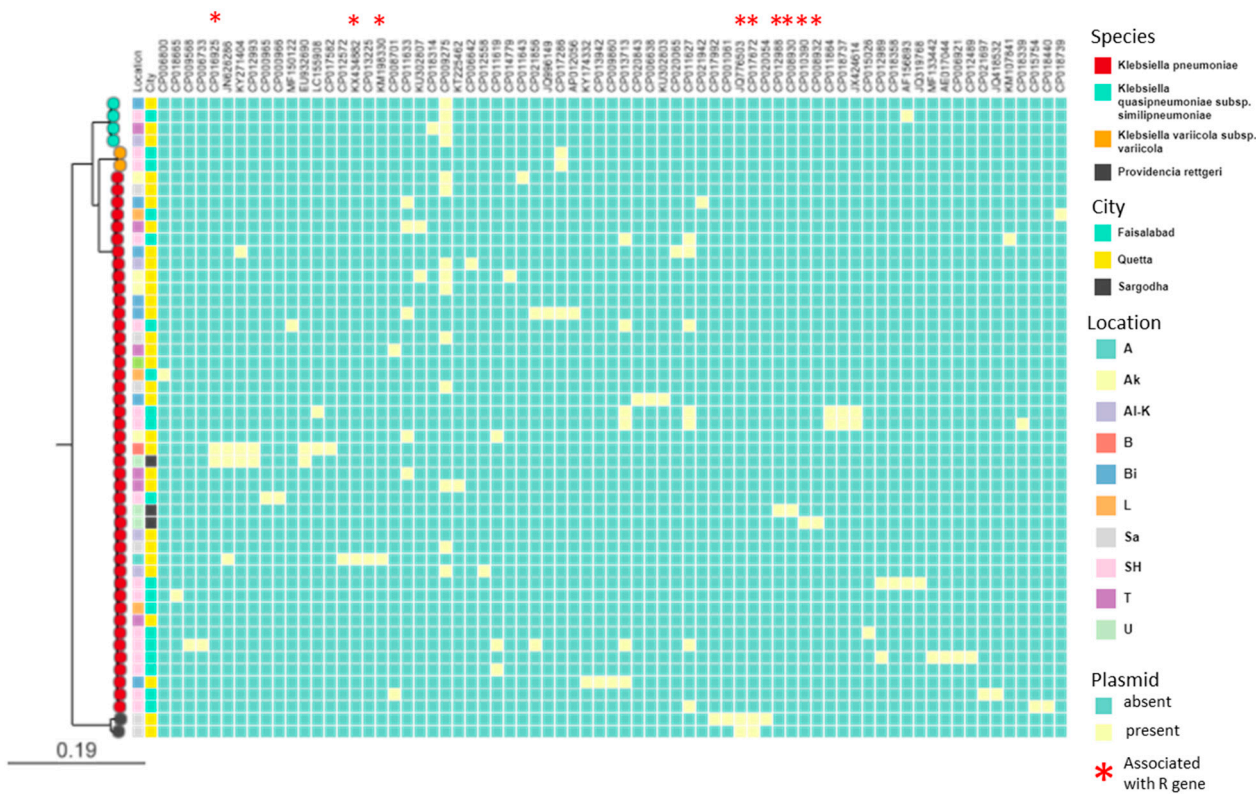

**Supplementary Figure S4.** Distribution of replicons.

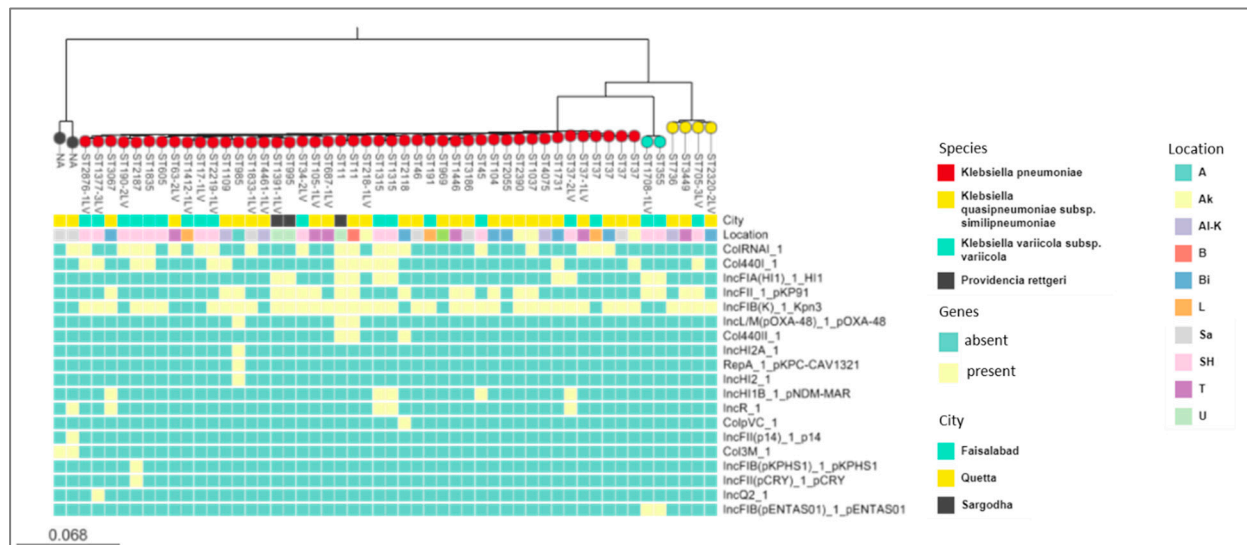

Supplement: s1 [file s1]
